# Supplementary material
Source: Springer Nature journal article supplement (https://www.springermedizin.de/resource/supplementary/13030_2014_151_MOESM6_ESM.pdf/9644852)

## Career: This person would be...

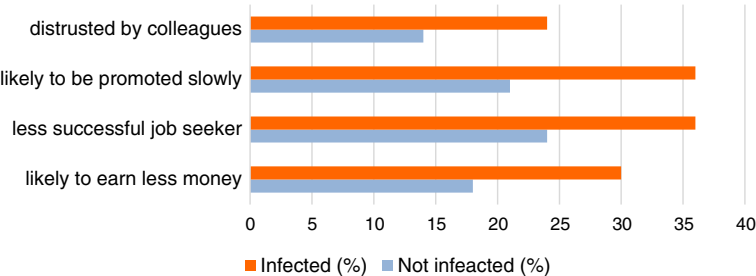

Supplement: MOESM6 [file 9644852]
